# Supplementary material for: Association of Circular RNA and Long Non-Coding RNA Dysregulation with the Clinical Response to Immune Checkpoint Blockade in Cutaneous Metastatic Melanoma
Source: MDPI journal article supplement (doi:10.3390/biomedicines10102419), 2022-09-27
Supplement: s1 [file s1]

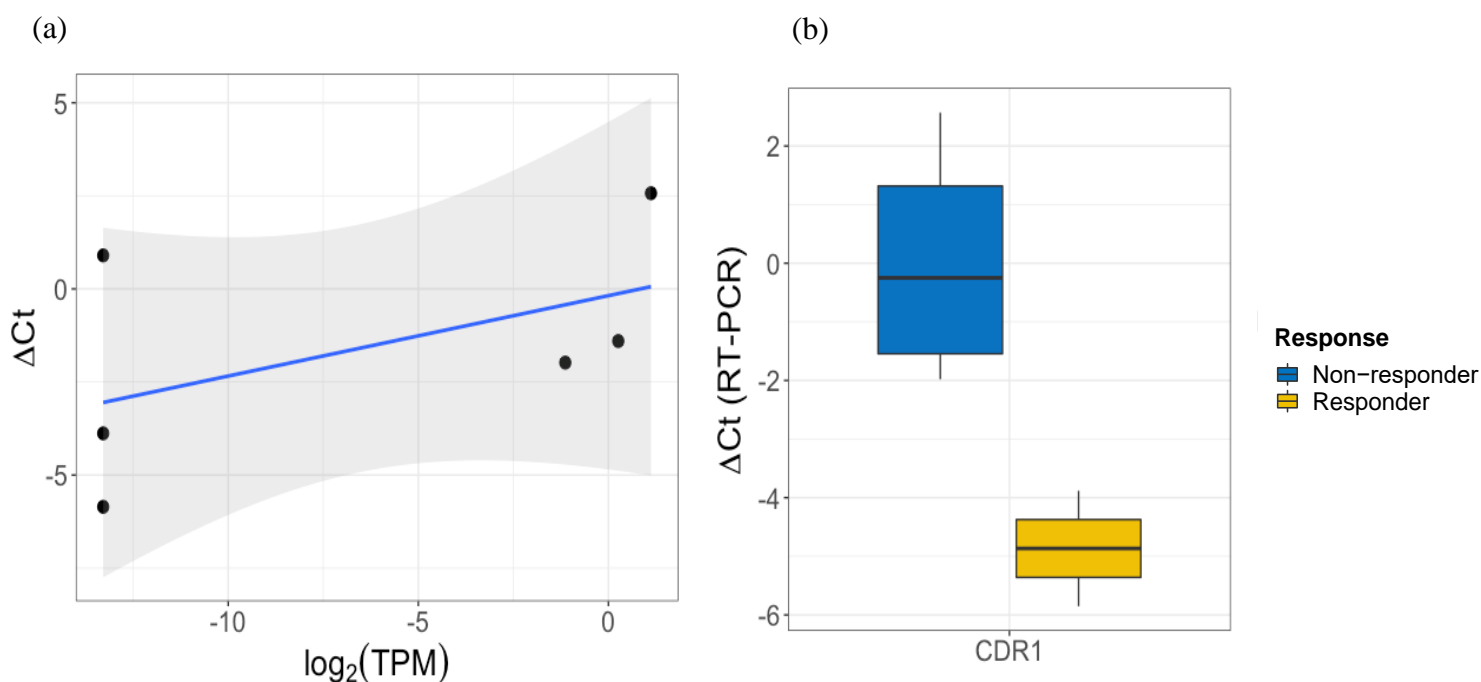

**Supplementary Figure S1.** RT-PCR validation of *CDR1*. (a) Correlation between  $\Delta\text{Ct}$  obtained by real time PCR and TPM generated by RNA-seq. (b)  $\Delta\text{Ct}$  of responders and non-responders.

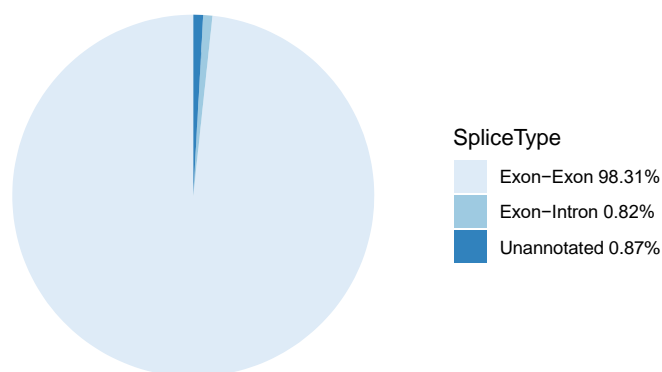

**Supplementary Figure S2.** CircRNAs exon types. Mapping of circRNAs indicates that 98.3% of identified circRNAs are exon-exon type.

Network 4: *Lineal\_ncRNA-relax\_genes\_and\_endo*: *Lineal\_ncRNA*: *Lineal\_ncRNA-relax\_genes\_and\_endo*

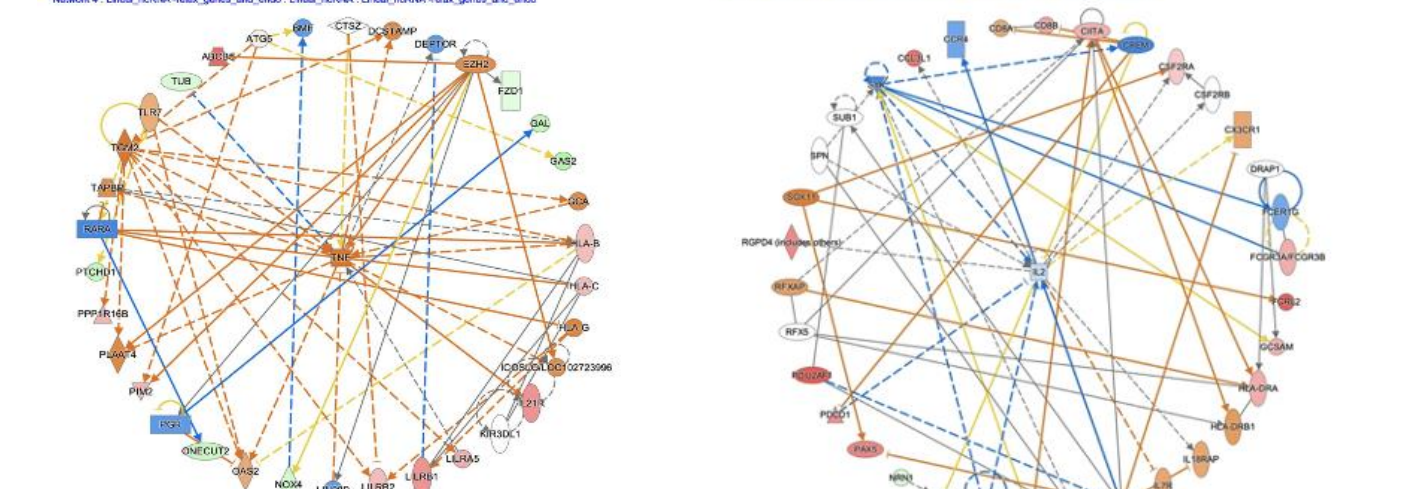

© 2000-2022 CMLZEN. All rights reserved.

Network 5: Linear ncRNA-relax\_genes and endo: Linear ncRNA: Linear ncRNA-relax\_genes and endo

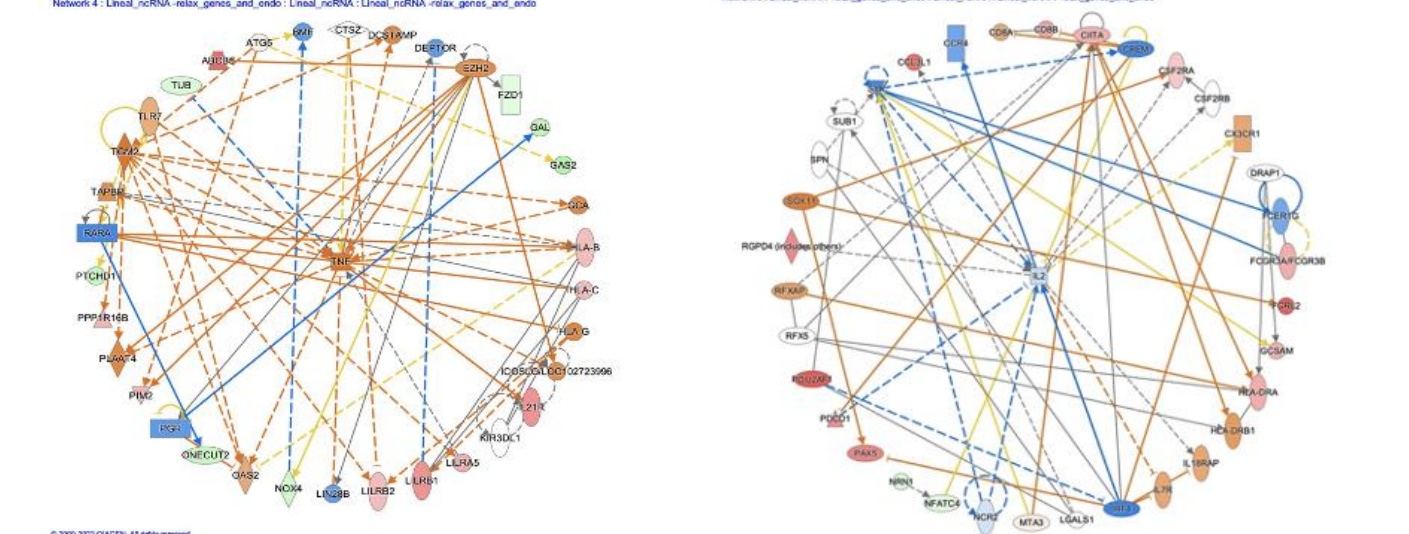

Network 6: Linear ncRNA-relax genes and endo: Linear ncRNA: Linear ncRNA-relax genes and endo

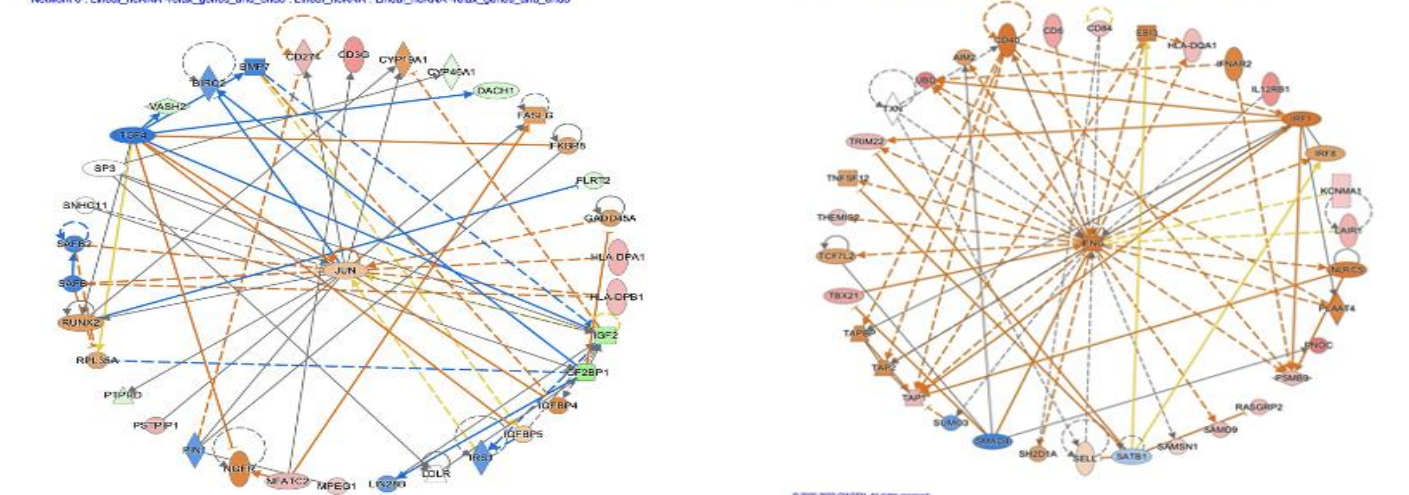

Network 2: Linear ncRNA-relax genes and endo: Linear ncRNA: Linear ncRNA-relax genes and endo

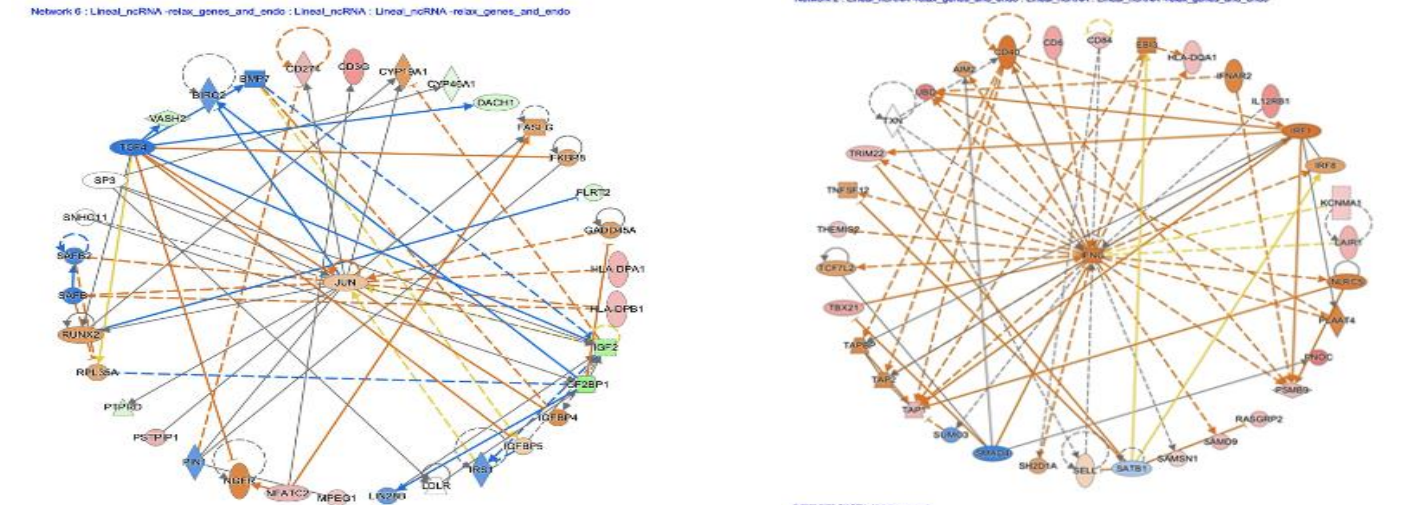

© 2005-2022 CHAGEN. All rights reserved.

Network 1: Linear\_ncRNA-relax\_genes\_and\_endo: Linear\_ncRNA: Linear\_ncRNA-relax\_genes\_and\_endo

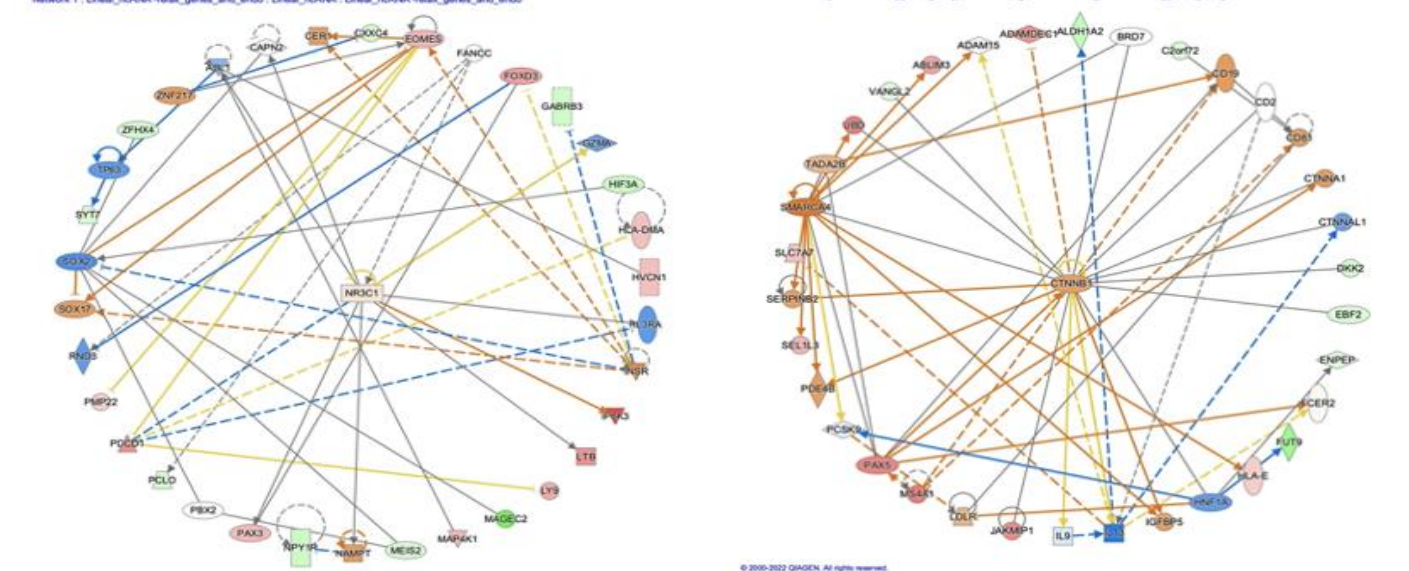

Network 3: Linear ncRNA-relax genes and endo: Linear ncRNA: Linear ncRNA-relax genes and endo

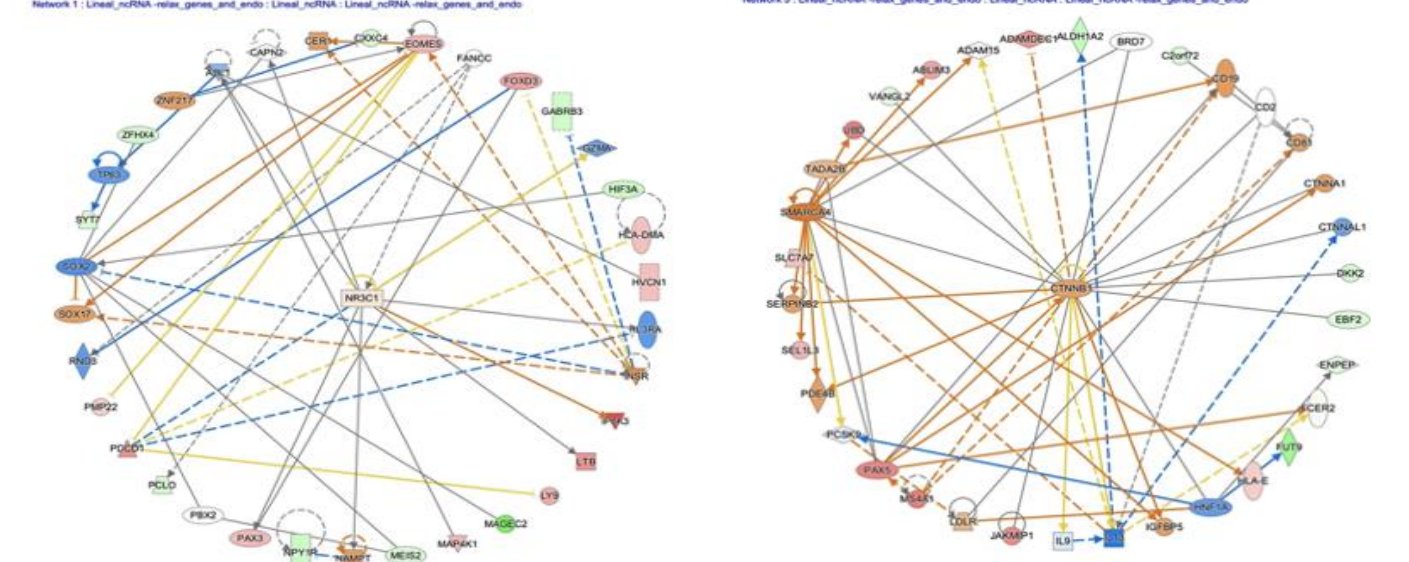

© 2000-2025 CHA/SEM. All rights reserved.

(b)

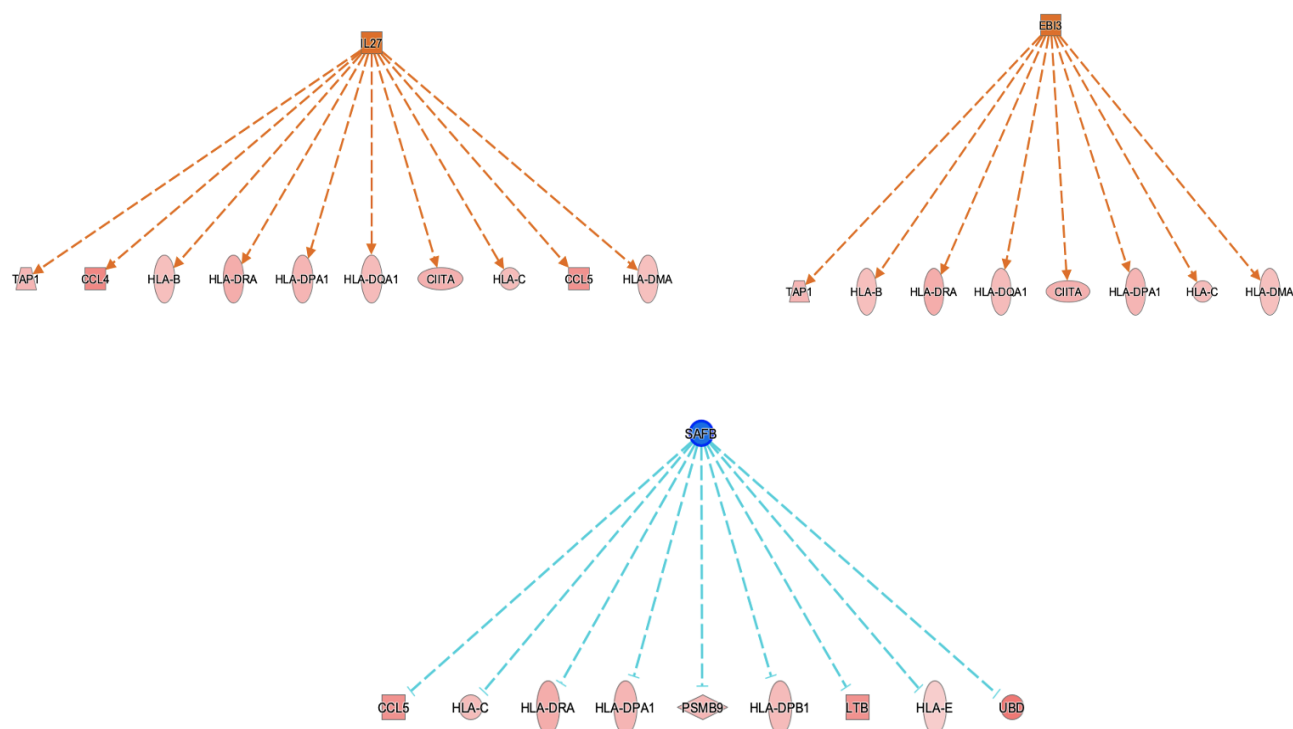

**Supplementary Figure S3.** Interaction networks and upstream molecules. **(a)** Interaction networks of the main molecules of the differentially expressed mRNAs of the ceRNA network predicted by IPA. **(b)** Main relevant activated upstream molecules are IL27 and EBI3, while SAFB is an important inhibited upstream regulator associated to our ceRNA network.

## IPA ontology

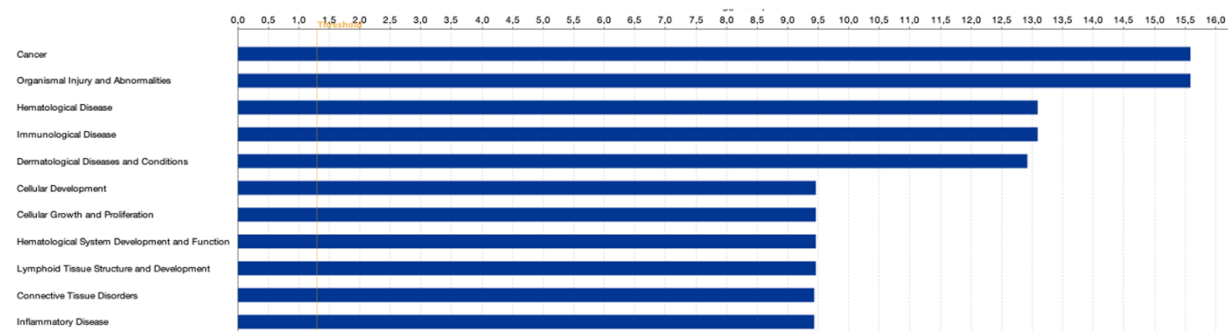

## Molecular and cellular function

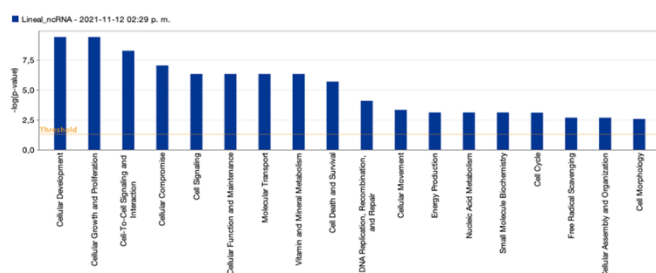

## Physiological system &amp; physiology

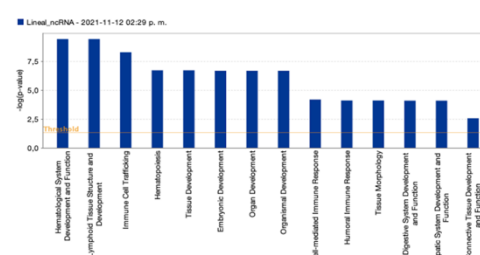

**Supplementary Figure S4.** Top enriched IPA ontologies and pathways of the molecular and cellular function and the physiological system and physiology.

**Supplementary Table S1.** Clinical characteristics of 12 CMM patients treated with immunotherapy.

| Variables          | Value     | Responders | Non-responders | Lost Values |
|--------------------|-----------|------------|----------------|-------------|
| Sex                | Female    | 5 (62.5%)  | 1 (25%)        | 0 (0%)      |
|                    | Male      | 3 (37.5%)  | 3 (75%)        |             |
| Stage at diagnosis | Stage I   | 1 (14.29%) | 0 (0%)         | 1 (0.08%)   |
|                    | Stage II  | 2 (28.57%) | 2 (50%)        |             |
|                    | Stage III | 4 (57.14%) | 0 (0%)         |             |
|                    | Stage IV  | 0 (0%)     | 2 (50%)        |             |
| Diabetes           | No        | 7 (87.5%)  | 3 (75%)        | 0 (0%)      |
|                    | Yes       | 0 (0%)     | 0 (0%)         |             |

|                                       |           |                    |                     |                  |        |
|---------------------------------------|-----------|--------------------|---------------------|------------------|--------|
|                                       | Yes       | 2 (16.67%)         | 1 (12.5%)           | 1 (25%)          |        |
| <b>Dyslipidemia</b>                   |           |                    |                     |                  | 0 (0%) |
|                                       | No        | 9 (75%)            | 5 (62.5%)           | 4 (100%)         |        |
|                                       | Yes       | 3 (25%)            | 3 (37.5%)           | 0 (0%)           |        |
| <b>Hypertension</b>                   |           |                    |                     |                  | 0 (0%) |
|                                       | No        | 4 (33.33%)         | 2 (25%)             | 2 (50%)          |        |
|                                       | Yes       | 8 (66.67%)         | 6 (75%)             | 2 (50%)          |        |
| <b>Status</b>                         |           |                    |                     |                  |        |
|                                       | Alive     | 4 (33.33%)         | 4 (50%)             | 0 (0%)           |        |
|                                       | Dead      | 8 (66.67%)         | 4 (50%)             | 4 (100%)         |        |
| <b>Overall survival time</b>          |           | 17.26 [0.92–45.97] | 26.49 [10.52–45.97] | 1.84 [0.92–3.28] | 0 (0%) |
| <b>Progression</b>                    |           |                    |                     |                  |        |
|                                       | No        | 3 (25%)            | 3 (37.5%)           | 0 (0%)           |        |
|                                       | Yes       | 9 (75%)            | 5 (62.5%)           | 4 (100%)         |        |
| <b>Progression-free survival time</b> |           | 8.98 [0.52–45.97]  | 15.74 [5.9 – 45.97] | 2.08 [0.52–2.33] | 0 (0%) |
| <b>Stage prior to ICB treatment</b>   |           |                    |                     |                  |        |
|                                       | Stage I   | 0 (0%)             | 0 (0%)              | 0 (0%)           |        |
|                                       | Stage II  | 0 (0%)             | 0 (0%)              | 0 (0%)           |        |
|                                       | Stage III | 0 (0%)             | 0 (0%)              | 0 (0%)           |        |
|                                       | Stage IV  | 11 (100%)          | 8 (100%)            | 4 (100%)         | 0 (0%) |
| <b>No. metastasis</b>                 |           | 2 [1–4]            | 2.5 [1–4]           | 2 [1–3]          | 0 (0%) |
| <b>Lung metastasis</b>                |           |                    |                     |                  | 0 (0%) |

|                                                          |                    |                    |                     |           |
|----------------------------------------------------------|--------------------|--------------------|---------------------|-----------|
| No                                                       | 4 (33.33%)         | 1 (12.5%)          | 3 (75%)             |           |
| Yes                                                      | 8 (66.67%)         | 7 (87.5%)          | 1 (25%)             |           |
| Lymph node metastasis                                    |                    |                    |                     | 0 (0%)    |
| No                                                       | 4 (33.33%)         | 4 (50%)            | 0 (0%)              |           |
| Yes                                                      | 8 (66.67%)         | 4 (50%)            | 4 (100%)            |           |
| LDH first metastasis (U/L)                               | 164 [107–498]      | 215 [164–498]      | 144 [107–153]       | 5 (0.42%) |
| LDH previous to IT (U/L)                                 | 235.5 [107–498]    | 260 [208–498]      | 191 [107–249]       | 4 (0.33%) |
| Lymphocytes previous to IT (counts × 10 <sup>6</sup> /L) | 1410 [370–2300]    | 1580 [370–2300]    | 1100 [500–1520]     | 2 (0.17%) |
| BRAF                                                     |                    |                    |                     | 0 (0%)    |
| Wild-type                                                | 10 (83.33%)        | 7 (87.5%)          | 3 (75%)             |           |
| Mutated                                                  | 2 (16.67%)         | 1 (12.5%)          | 1 (25%)             |           |
| No. Previous lines                                       | 0 [0–2]            | 0 [0–2]            | 0 [0–1]             | 0 (0%)    |
| Age at start IT                                          | 62.74 [19.1–74.38] | 68.91 [19.1–74.38] | 55.01 [41.32–68.72] | 0 (0%)    |
| Toxicity IT                                              |                    |                    |                     | 0 (0%)    |
| No                                                       | 3 (25%)            | 1 (12.5%)          | 2 (50%)             |           |
| Yes                                                      | 9 (75%)            | 7 (87.5%)          | 2 (50%)             |           |
